# Supplementary material for: Blue light-excited broadband NIR-II-emitting Li2ZnSn3O8:Cr3+,Ni2+ phosphor for multifunctional optical applications
Source: Royal Society of Chemistry journal article supplement (doi:10.1039/d4qi00896k), 2024-01-01
Supplement: d4qi00896k1.pdf [file d4qi00896k1.pdf]

# Blue Light Excited Broadband NIR-II-emitting $\text{Li}_2\text{ZnSn}_3\text{O}_8:\text{Cr}^{3+},\text{Ni}^{2+}$ Phosphor for Multifunctional Optical Applications

Zhexuan Gao<sup>a</sup>, Yi Zhang<sup>a</sup>, Yinyan Li<sup>a</sup>, Shilong Zhao<sup>a</sup>, Peng Zhang<sup>a</sup>, Xiaolong Dong<sup>b</sup>,

Degang Deng<sup>\*a</sup>, Shiqing Xu<sup>\*a</sup>

<sup>a</sup> Key Laboratory of Rare Earth Optoelectronic Materials and Devices of Zhejiang Province, Institute of Optoelectronic Materials and Devices, China Jiliang University, Hangzhou 310018, China

<sup>b</sup> Fujian Institute of Metrology, Fuzhou, 350003, China

## Supporting information

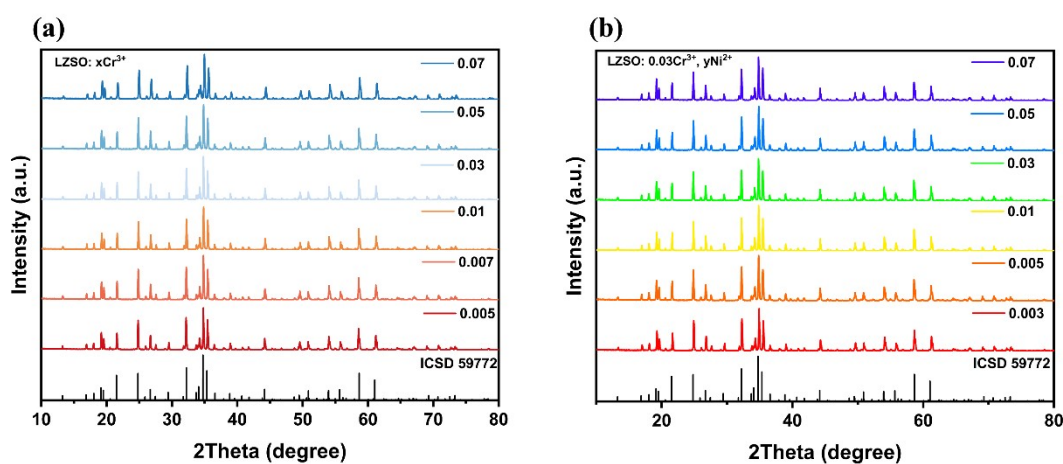

**Figure S1.** Powder XRD patterns of a) LZSO: $y\text{Cr}^{3+}$ , and b) LZSO: $0.03\text{Cr}^{3+},y\text{Ni}^{2+}$  samples ( $x, y = 0.003-0.07$ ). The corresponding standard PDF card data of LZSO (ICSD 59772) is given as a reference.

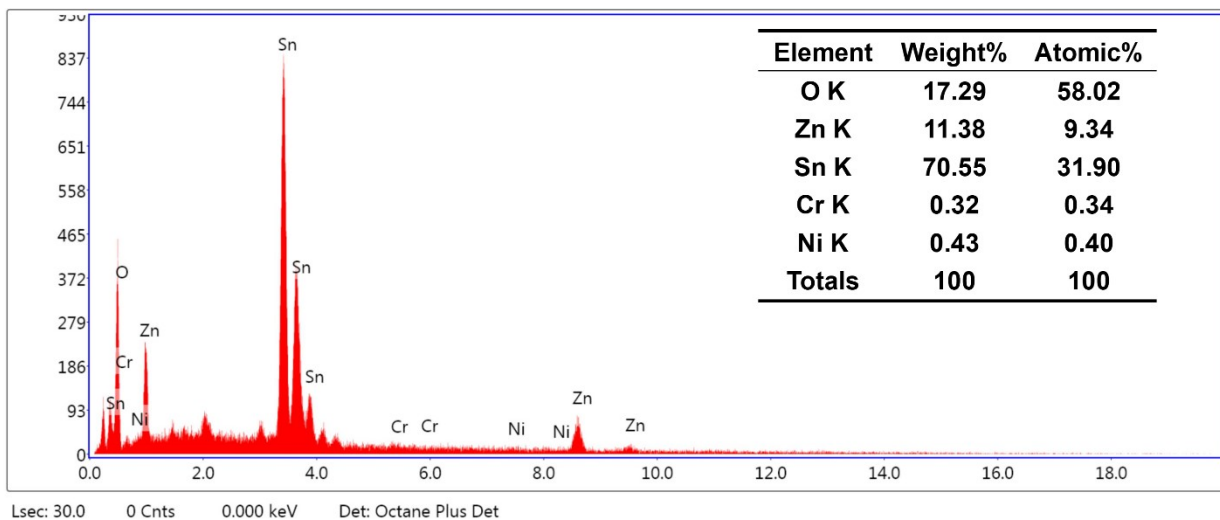

**Figure S2.** The EDS spectrum of LZSO:0.03Cr<sup>3+</sup>,0.03Ni<sup>2+</sup> phosphor.

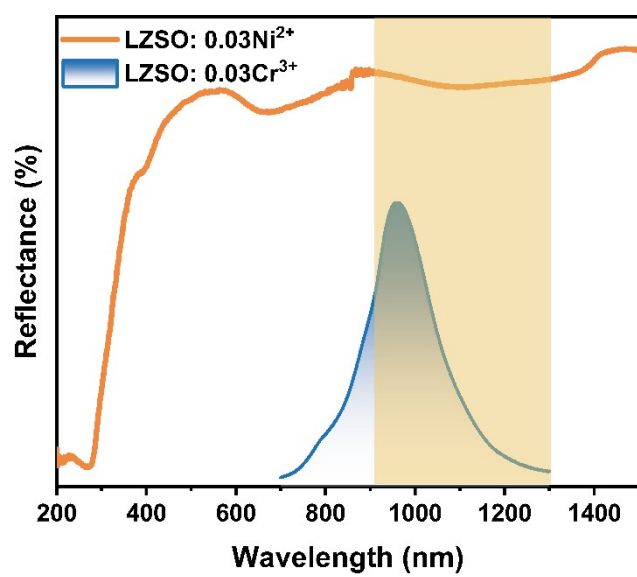

**Figure S3.** The overlap between the PL of LZSO:Cr<sup>3+</sup> and PLE of LZSO:Ni<sup>2+</sup>.

The Tanabe–Sugano energy level diagram can be used to represent the split of the 3d8 energy levels of Ni<sup>2+</sup> in the octahedral field when Ni<sup>2+</sup> (3d<sup>8</sup>) ions are located in the octahedral coordination field, and the crystal field strength of Ni<sup>2+</sup> in the octahedral can be described using the Tanabe–Sugano theory, and the crystal field strength  $Dq$  and Racah parameter  $B$  can be obtained according to the following equation:<sup>(1)</sup>

$$D_q = \frac{v_1}{10} \quad (1)$$

$$B = \frac{(v_3 - 2v_1) \cdot (v_3 - v_1)}{3(5v_3 - 9v_1)} \quad (2)$$

In the equations,  $v_3$  and  $v_1$  correspond to 400 nm [<sup>3</sup>A<sub>2g</sub>(F) → <sup>3</sup>T<sub>1g</sub>(P), 25000cm<sup>-1</sup>], and 1100 nm [<sup>3</sup>A<sub>2g</sub>(F) → <sup>3</sup>T<sub>2g</sub>(F), 9090.9 cm<sup>-1</sup>], respectively. Therefore,  $Dq$  is 909.09 cm<sup>-1</sup>,  $B$  is 837.32 cm<sup>-1</sup> and  $Dq/B$  is 1.09, respectively.

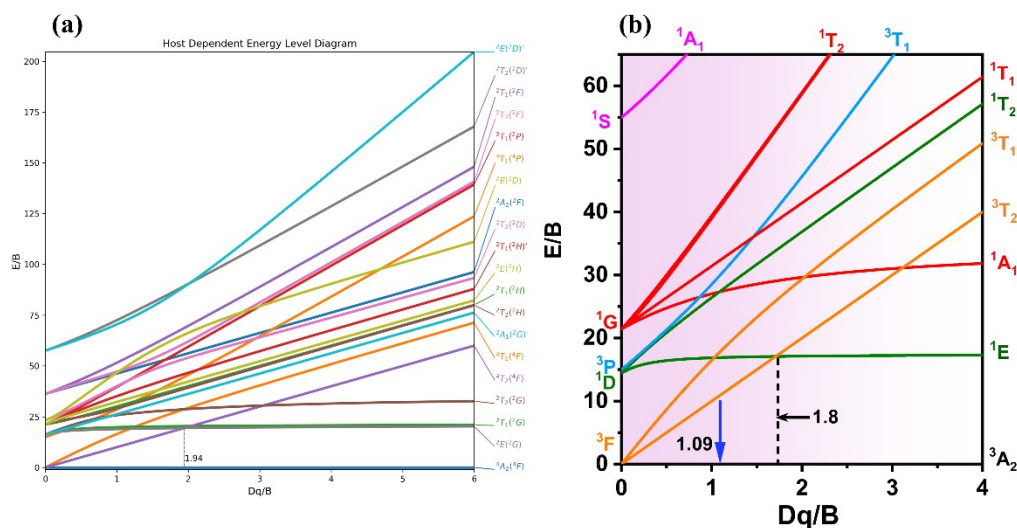

**Figure S4.** Tanabe-Sugano diagram for a) Cr<sup>3+</sup> and b) Ni<sup>2+</sup> ion in octahedral coordination.

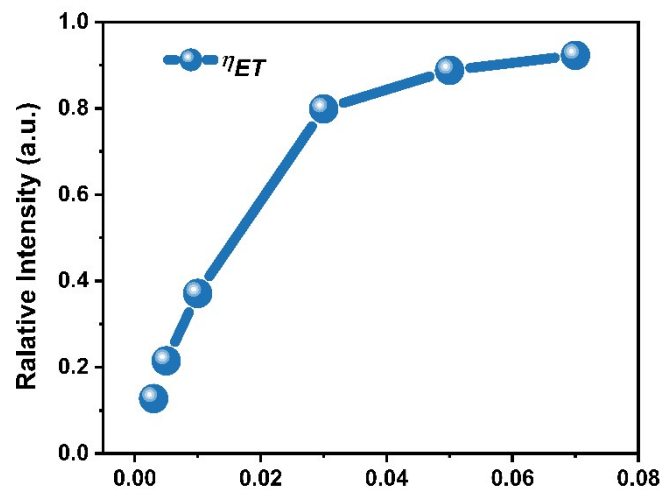

**Figure S5** The ET efficiency based on the Intensity of Cr<sup>3+</sup> concentration in LZSO:0.03Cr<sup>3+</sup>,yNi<sup>2+</sup> system.

IQE is the ratio of the number of emitted photons to the number of absorbed photons, EQE is the ratio of the number of emitted photons to the number of total photons excited by the light source, and absorption efficiency ( $\alpha$ Abs) is the proportion of the number of photons absorbed by the sample and the number of total photons excited by the light source. The relationship among IQE, EQE and  $\alpha$ Abs can be expressed by the following equations:<sup>(2)</sup>

$$IQE = \frac{\int L_S}{\int E_R - \int E_S} \quad (3)$$

$$AE = \frac{\int E_R - \int E_S}{\int E_R} \quad (4)$$

$$EQE = AE \times IQE = \frac{\int L_S}{\int E_R} \quad (5)$$

where  $E_S$  stands for the spectrum used for exciting the phosphor,  $L_S$  represents the emission spectrum of the phosphor, and  $E_R$  is the spectrum of excitation light without phosphor in the sphere. Taking into account the 2.13% unmeasured portion. Hence, the IQE, AE, and EQE of LZSO:0.03Cr<sup>3+</sup>,0.03Ni<sup>2+</sup> are 43.31%, 42.11%, and 18.24%.

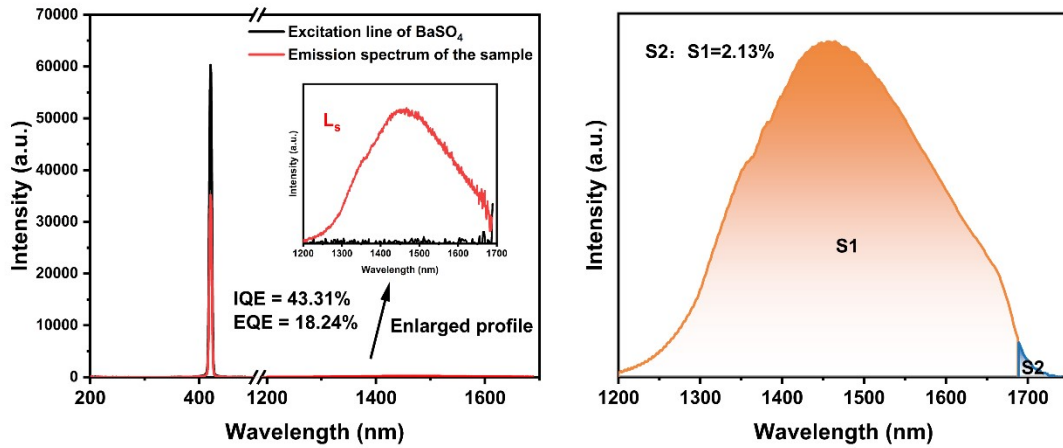

Figure S6 IQE and EQE of LZSO:0.03Cr<sup>3+</sup>,0.03Ni<sup>2+</sup>.

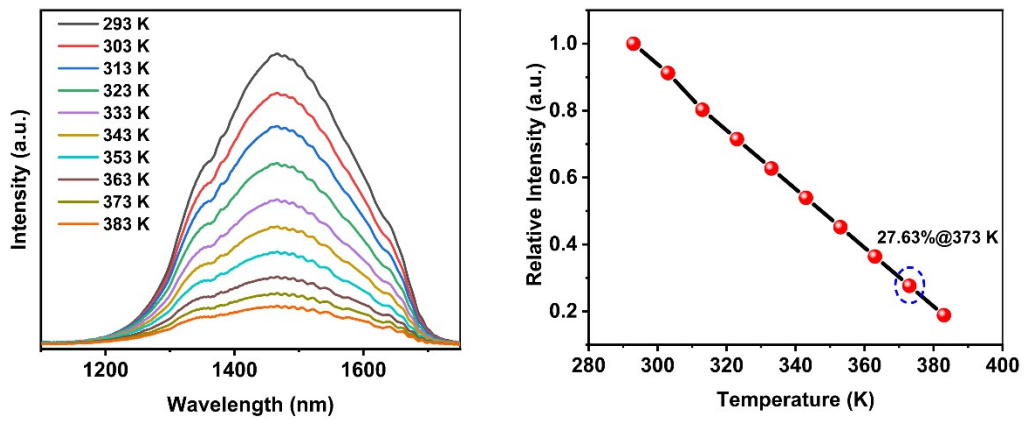

**Figure S7** Temperature-dependent emission spectra and relative intensity of LZSO:0.03Ni<sup>2+</sup>.

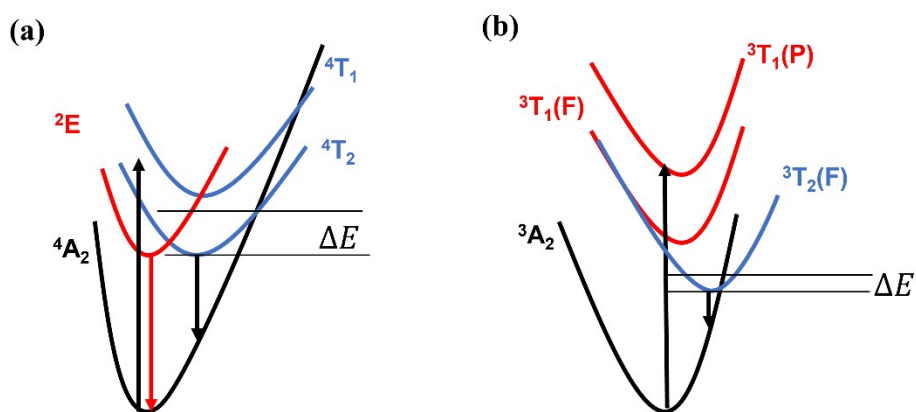

**Figure S8.** Configuration coordinate diagram of Cr<sup>3+</sup> and Ni<sup>2+</sup> illustrating the thermal quenching.



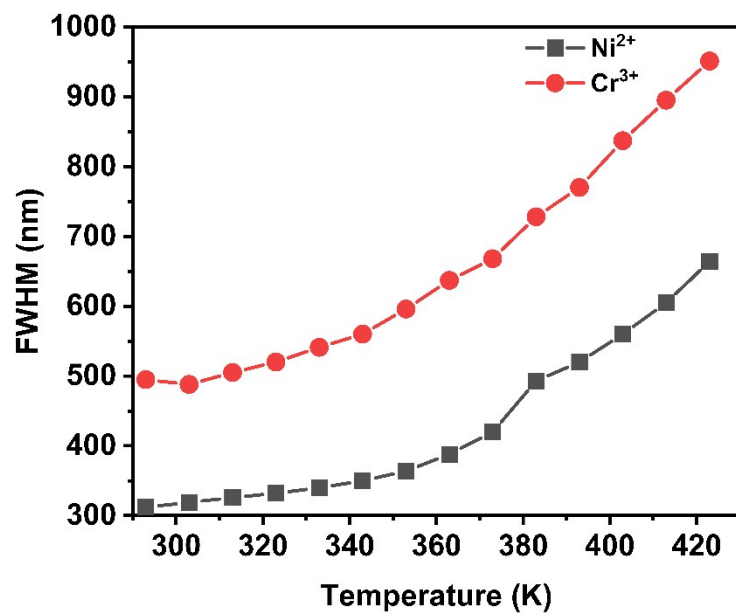

Figure S9. FWHM of LZSO:0.03Cr<sup>3+</sup>,0.03Ni<sup>2+</sup>.

**Table S1.** Refined results of the LZSO sample

| formula                             | LZSO          |
|-------------------------------------|---------------|
| radiation type; $\lambda$ (Å)       | X-ray; 1.5406 |
| $2\theta$ (degrees)                 | 10-80         |
| temperature (°C)                    | 20            |
| space group                         | Cmc21         |
| a (Å)                               | 18.2355       |
| b (Å)                               | 10.5209       |
| c (Å)                               | 9.8906        |
| $\alpha = \beta = \gamma$ (degrees) | 90            |
| V (Å <sup>3</sup> )                 | 1897.558      |
| profile R-factor, $R_p$             | 5.85          |
| weighted profile R-factor, $R_{wp}$ | 9.28          |
| $\chi^2$                            | 1.584         |

---

**Table S2.** Refined atomic positions of the LZSO sample

| atom | occ. | x      | y      | z      | uiso    | site |
|------|------|--------|--------|--------|---------|------|
| Sn1  | 1    | 0.0875 | 0.0715 | 0      | 0.01369 | 8b   |
| Sn2  | 1    | 0.0856 | 0.5927 | 0.001  | 0.01442 | 8b   |
| Sn3  | 1    | 0.1726 | 0.334  | 0.004  | 0.01194 | 8b   |
| Li1  | 1    | 0.249  | 0.082  | 0.007  | 0.012   | 8b   |
| Li2  | 1    | 0      | 0.836  | 0.01   | 0.01362 | 4a   |
| Li3  | 1    | 0      | 0.032  | 0.293  | 0.01186 | 4a   |
| Li4  | 1    | 0.182  | 0.481  | 0.279  | 0.0142  | 8b   |
| Zn1  | 1    | 0      | 0.331  | 0.19   | 0.01362 | 4a   |
| Zn2  | 1    | 0.167  | 0.831  | 0.193  | 0.01186 | 8b   |
| Sn4  | 1    | 1      | 0.669  | 0.283  | 0.01819 | 4a   |
| Sn5  | 1    | 0.168  | 0.168  | 0.281  | 0.01548 | 8b   |
| O1   | 1    | 0      | 0.159  | -0.108 | 0.01588 | 4a   |
| O2   | 1    | 0.0834 | -0.078 | -0.121 | 0.01617 | 8b   |
| O3   | 1    | 0      | 0.664  | -0.105 | 0.01663 | 4a   |
| O4   | 1    | 0.0825 | 0.42   | -0.111 | 0.0132  | 8b   |
| O5   | 1    | 0.249  | 0.415  | -0.119 | 0.01195 | 8b   |
| O6   | 1    | 0.1651 | 0.67   | -0.108 | 0.01728 | 8b   |
| O7   | 1    | 0.165  | 0.171  | -0.103 | 0.01353 | 8b   |
| O8   | 1    | 0      | 0.007  | 0.108  | 0.01439 | 4a   |
| O9   | 1    | 0      | 0.52   | 0.135  | 0.01172 | 4a   |
| O10  | 1    | 0.0918 | 0.241  | 0.128  | 0.01439 | 8b   |
| O11  | 1    | 0.0773 | 0.738  | 0.141  | 0.01671 | 8b   |
| O12  | 1    | 0.1648 | 0.014  | 0.139  | 0.01624 | 8b   |
| O13  | 1    | 0.2389 | 0.251  | 0.147  | 0.01444 | 8b   |
| O14  | 1    | 0.1653 | 0.5    | 0.1    | 0.01319 | 8b   |

**Table S3.** The optical performance comparison of LZSO:0.03Cr<sup>3+</sup>,0.03Ni<sup>2+</sup> and previously reported NIR-II phosphors

| <i>Phosphors</i>                                                                 | Excitaion<br>(nm) | <i>FWH</i><br><i>M</i><br>(nm) | <i>Emission</i><br><i>range (nm)</i> | <i>IQE (%)</i> | <i>EQ</i><br><i>E</i><br>(%<br>) | <i>Ref</i>   |
|----------------------------------------------------------------------------------|-------------------|--------------------------------|--------------------------------------|----------------|----------------------------------|--------------|
| Ba <sub>2</sub> MgWO <sub>6</sub> :Ni <sup>2+</sup>                              | 365               | 255                            | 1200–2000                            | 16.67          | --                               | (3)          |
| SrTiO <sub>3</sub> :Ni <sup>2+</sup>                                             | 375               | 192                            | 1100–1600                            | 7.4            | --                               | (4)          |
| MgTiO <sub>3</sub> :Ni <sup>2+</sup>                                             | 450               | 120                            | 1500–2000                            | 3.1            | --                               | (4)          |
| CaTiO <sub>3</sub> :Ni <sup>2+</sup>                                             | 375               | 212                            | 1150–1600                            | 4.3            | --                               | (5)          |
| MgAl <sub>2</sub> O <sub>4</sub> :Ni <sup>2+</sup>                               | 365               | 237                            | 1100–1600                            | --             | --                               | (6)          |
| ZnGa <sub>2</sub> O <sub>4</sub> :Ni <sup>2+</sup>                               | 365               | --                             | 1100–1600                            | --             | --                               | (7)          |
| Y <sub>3</sub> Al <sub>2</sub> Ga <sub>3</sub> O <sub>12</sub> :Ni <sup>2+</sup> | 400               | 300                            | 1200–1650                            | 54             | 8.2                              | (1)          |
| Mg <sub>3</sub> Ga <sub>2</sub> GeO <sub>8</sub> :Ni <sup>2+</sup>               | 395               | 300                            | 1100–1700                            | 36.7           | 7.3                              | (8)          |
| Mg <sub>2</sub> Ta <sub>4</sub> O <sub>9</sub> :Ni <sup>2+</sup>                 | 404               | 218                            | 1100–1700                            | 64             | 11.2                             | (9)          |
| MgO:Ni <sup>2+</sup>                                                             | 405               | 204                            | 1100–1700                            | --             | --                               | (10)         |
| LZSO:0.03Cr <sup>3+</sup> ,0.03Ni <sup>2+</sup>                                  | 426               | 300                            | 1100–1750                            | 43             | 18                               | This<br>work |

## Reference

1. Yuan L, Jin Y, Wu H, Deng K, Qu B, Chen L, et al. Ni<sup>2+</sup>-Doped Garnet Solid-Solution Phosphor-Converted Broadband Shortwave Infrared Light-Emitting Diodes toward Spectroscopy Application, *ACS Appl. Mater. Interfaces*, 2022, **14**, 4265-4275.
2. Chen S, Lin J, Han M, Li J, Zhang Q, Chen Y, et al. Broadband near-infrared emitting Cr<sup>3+</sup>-activated InGaO<sub>3</sub>(ZnO)<sub>4</sub> phosphor and its application in pc-LEDs. *Mater. Res. Bull.*, 2023, **164**, 112280.
3. Lu X, Gao Y, Chen J, Tan M, Qiu J. Long-Wavelength Near-Infrared Divalent Nickel-Activated Double-Perovskite Ba<sub>2</sub>MgWO<sub>6</sub> Phosphor as Imaging for Human Fingers, *ACS Appl. Mater. Interfaces*, 2023, **15**, 39472-39479.
4. Gao Y, Wang B, Liu L, Shinozaki K. Near-infrared engineering for broad-band wavelength-tunable in biological window of NIR-II and -III: A solid solution phosphor of Sr<sub>1-x</sub>Ca<sub>x</sub>TiO<sub>3</sub>:Ni<sup>2+</sup>, *J. Lumin.*, 2021, **238**, 118235.
5. Matuszewska C, Marciniak L. The influence of host material on NIR II and NIR III emitting Ni<sup>2+</sup>-based luminescent thermometers in ATiO<sub>3</sub>: Ni<sup>2+</sup> (A = Sr, Ca, Mg, Ba) nanocrystals, *J. Lumin.*, 2020, **223**, 117221.
6. Deng Y, Gao Y, Zhu F, Zhu B, Huang L, Qiu J. Sol-gel combustion synthesis and near-infrared luminescence of Ni<sup>2+</sup>-doped MgAl<sub>2</sub>O<sub>4</sub> spinel phosphor, *Ceram. Int.*, 2024, **50**, 12319-12325.
7. Jin M, Li F, Xiahou J, Zhu L, Zhu Q, Li J-G. A new persistent luminescence phosphor of ZnGa<sub>2</sub>O<sub>4</sub>:Ni<sup>2+</sup> for the second near-infrared transparency window, *J. Alloy. Compd.*, 2023, **931**, 167491.
8. Wang C, Lin J, Zhang X, Dong H, Wen M, Zhao S, et al. Efficient ultra-broadband NIR-II emission achieved by multi-site occupancy in Mg<sub>3</sub>Ga<sub>2</sub>GeO<sub>8</sub>: Ni<sup>2+</sup> phosphor, *J. Alloy. Compd.*, 2023, **942**, 168893.
9. Li J, Wang C, Niu Y, Wang Y, Wu F, Qi z, et al. Efficient broad-band NIR-II emitting phosphor Mg<sub>4</sub>Ta<sub>2</sub>O<sub>9</sub>: Ni<sup>2+</sup> with satisfactory thermal stability of luminescence, *Ceram. Int.*, 2024, **50**, 18647-18654.
10. Liu B-M, Gu S-M, Huang L, Zhou R-F, Zhou Z, Ma C-G, et al. Ultra-broadband and high-efficiency phosphors to brighten NIR-II light source applications, *Cell Rep. Phys. Sci.*, 2022, **3**, 101078.
